# Supplementary material for: Mesenchymal stem cells protect against TBI-induced pyroptosis in vivo and in vitro through TSG-6
Source: PubMed Central journal article supplement (PMC9387023; doi:10.1186/s12964-022-00931-2), 2022-08-18

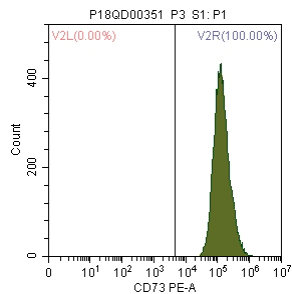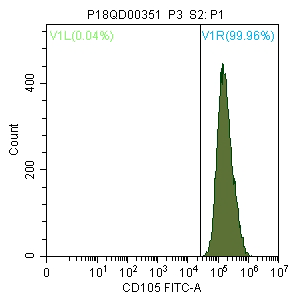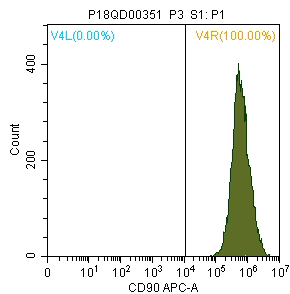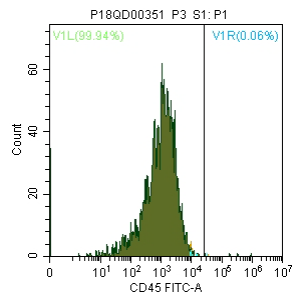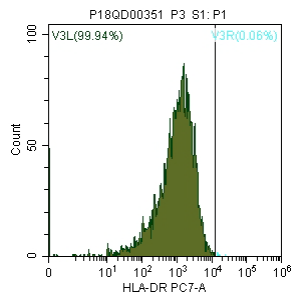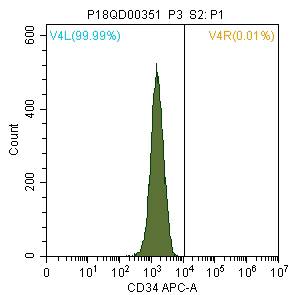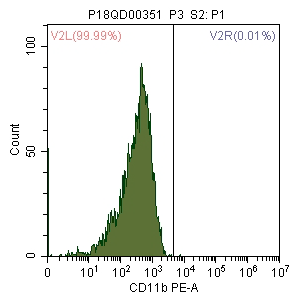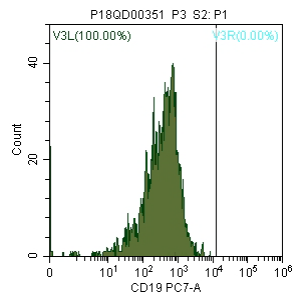

Supplement: 12964_2022_931_MOESM2_ESM.pdf [file 12964_2022_931_MOESM2_ESM.pdf]
